# Supplementary material for: Network Pharmacology and Molecular Docking Analysis Explores the Mechanisms of Cordyceps sinensis in the Treatment of Oral Lichen Planus
Source: Hindawi journal article supplement (doi:10.1155/2022/3156785), 2022-08-29
Supplement: f1 [file 3156785.f1.zip]

parameter of 52 significant OLP-related targets.

| <b>Gene</b> | <b>Degree</b> | <b>Betweenness Centrality</b> | <b>Closeness Centrality</b> |
|-------------|---------------|-------------------------------|-----------------------------|
| TNF         | 97            | 3961.27947                    | 174.58333                   |
| IL6         | 86            | 2917.72259                    | 169.25                      |
| CD4         | 75            | 3363.9721                     | 160.83333                   |
| EGFR        | 73            | 5126.4444                     | 163.33333                   |
| IL1B        | 72            | 1412.23644                    | 160.66667                   |
| IL10        | 70            | 1412.55088                    | 159.25                      |
| AKT1        | 69            | 2694.5633                     | 160.75                      |
| VEGFA       | 66            | 1572.88131                    | 157.66667                   |
| TP53        | 64            | 3298.83181                    | 156.66667                   |
| IL2         | 65            | 1705.2                        | 155.25                      |
| ACTB        | 61            | 2666.82879                    | 156.75                      |
| CD8A        | 61            | 1877.80198                    | 150.33333                   |
| ALB         | 60            | 3303.27204                    | 155.41667                   |
| IL4         | 57            | 1463.29923                    | 150.91667                   |
| INS         | 58            | 2708.62162                    | 152.66667                   |
| JUN         | 57            | 2139.07331                    | 154                         |
| CXCL8       | 57            | 786.6826                      | 149.75                      |
| CTNNB1      | 56            | 2930.86645                    | 150.33333                   |
| PIK3CA      | 56            | 1737.10795                    | 152.16667                   |
| IFNG        | 56            | 641.07604                     | 148.75                      |
| CD44        | 55            | 3126.60237                    | 153.41667                   |
| CCL2        | 53            | 874.69482                     | 146                         |
| TLR4        | 50            | 2107.18692                    | 149.08333                   |
| RELA        | 52            | 1262.92787                    | 149.16667                   |
| CASP3       | 50            | 2492.63444                    | 149.08333                   |
| HRAS        | 49            | 563.76981                     | 147.16667                   |
| IL17A       | 49            | 432.03669                     | 142                         |
| EGF         | 48            | 617.86875                     | 147.91667                   |
| IGF1        | 47            | 941.78194                     | 145.66667                   |
| MMP9        | 45            | 1041.04582                    | 145.58333                   |
| CCL5        | 45            | 447.80915                     | 139.75                      |
| MYC         | 43            | 525.88133                     | 142.91667                   |
| FGF2        | 42            | 468.85832                     | 143.08333                   |
| ESR1        | 41            | 1160.11543                    | 140.66667                   |
| CAV1        | 38            | 2013.49848                    | 143.16667                   |
| ICAM1       | 40            | 491.39752                     | 140.25                      |
| TLR2        | 39            | 984.68523                     | 141.25                      |
| ERBB2       | 39            | 795.21876                     | 143.16667                   |
| HIF1A       | 39            | 470.85878                     | 140.5                       |
| CDH1        | 38            | 1062.98789                    | 141.58333                   |
| TGFB1       | 33            | 834.2747                      | 138.5                       |
| MYD88       | 31            | 907.26322                     | 131.58333                   |
| MMP2        | 30            | 660.39559                     | 134.66667                   |
| FOS         | 30            | 611.94498                     | 134.91667                   |
| MTOR        | 30            | 634.53885                     | 133.66667                   |
| CRP         | 29            | 441.47369                     | 128.75                      |
| AR          | 27            | 698.0675                      | 130.66667                   |
| NGF         | 28            | 749.83033                     | 132.75                      |
| PTGS2       | 25            | 1140.17548                    | 135.83333                   |

|        |    |           |           |
|--------|----|-----------|-----------|
| CASP8  | 23 | 484.13075 | 128.75    |
| PDGFRB | 21 | 556.12025 | 128.5     |
| POMC   | 21 | 770.64767 | 123.61667 |
