# Supplementary material for: Network Pharmacology and Molecular Docking Analysis Explores the Mechanisms of Cordyceps sinensis in the Treatment of Oral Lichen Planus
Source: Hindawi journal article supplement (doi:10.1155/2022/3156785), 2022-08-29
Supplement: f1 [file 3156785.f1.zip]

Supplement 2. The 293 OLP-related human genes.

|         |                    |
|---------|--------------------|
| IL10    | DisGeNET, GeneCard |
| TP53    | DisGeNET, GeneCard |
| TNF     | DisGeNET, GeneCard |
| IFNG    | DisGeNET, GeneCard |
| TLR4    | DisGeNET, GeneCard |
| IL6     | DisGeNET, GeneCard |
| TLR2    | DisGeNET, GeneCard |
| MMP9    | DisGeNET, GeneCard |
| CXCL8   | DisGeNET, GeneCard |
| IL4     | DisGeNET, GeneCard |
| PTGS2   | DisGeNET, GeneCard |
| FOXP3   | DisGeNET, GeneCard |
| MIR27B  | DisGeNET, GeneCard |
| IL1B    | DisGeNET, GeneCard |
| TP63    | DisGeNET, GeneCard |
| IL17A   | DisGeNET, GeneCard |
| MIR155  | DisGeNET, GeneCard |
| MIR203A | DisGeNET, GeneCard |
| RPE65   | DisGeNET           |
| UVRAG   | DisGeNET           |
| BCL2    | DisGeNET, GeneCard |
| CKAP4   | DisGeNET           |
| CCL5    | DisGeNET, GeneCard |
| MTCO2P1 | DisGeNET           |
| IGF1    | DisGeNET, GeneCard |
| H3P10   | DisGeNET           |
| CDKN2A  | DisGeNET, GeneCard |
| VDR     | DisGeNET, GeneCard |
| CCR5    | DisGeNET, GeneCard |
| MTOR    | DisGeNET, GeneCard |
| CD44    | DisGeNET, GeneCard |
| HMGB1   | DisGeNET, GeneCard |
| HIF1A   | DisGeNET, GeneCard |
| IL22    | DisGeNET           |
| CYP2D6  | DisGeNET, GeneCard |
| MIR137  | DisGeNET, GeneCard |
| COX2    | DisGeNET           |
| DEFB4A  | DisGeNET, GeneCard |
| MIR21   | DisGeNET, GeneCard |
| CXCL10  | DisGeNET, GeneCard |
| MIR146A | DisGeNET, GeneCard |
| SPP1    | DisGeNET, GeneCard |
| TLR3    | DisGeNET           |
| KRT19   | DisGeNET, GeneCard |
| MIR125A | DisGeNET           |
| IL18    | DisGeNET, GeneCard |
| TERC    | DisGeNET           |
| MBL2    | DisGeNET, GeneCard |
| TGFB1   | DisGeNET, GeneCard |
| IL9     | DisGeNET           |

|         |                    |
|---------|--------------------|
| CXCL9   | DisGeNET, GeneCard |
| ACTB    | DisGeNET           |
| ISG20   | DisGeNET           |
| KDR     | DisGeNET           |
| MDM2    | DisGeNET, GeneCard |
| TG      | DisGeNET, GeneCard |
| IL2RA   | DisGeNET, GeneCard |
| CXCR3   | DisGeNET, GeneCard |
| TSLP    | DisGeNET           |
| MAP1LC3 | DisGeNET           |
| CDKN1A  | DisGeNET, GeneCard |
| PPIG    | DisGeNET           |
| AKT1    | DisGeNET, GeneCard |
| NLRP3   | DisGeNET           |
| IL23A   | DisGeNET           |
| VEGFA   | DisGeNET, GeneCard |
| CD14    | DisGeNET, GeneCard |
| DEFB4B  | DisGeNET           |
| IL33    | DisGeNET, GeneCard |
| CRP     | DisGeNET           |
| COL17A1 | GeneCard           |
| DSG3    | GeneCard           |
| KRT13   | GeneCard           |
| ICAM1   | GeneCard           |
| OSMR    | GeneCard           |
| MMP1    | GeneCard           |
| IL2     | GeneCard           |
| EGFR    | GeneCard           |
| CASP3   | GeneCard           |
| KRT16   | GeneCard           |
| IL1A    | GeneCard           |
| HRAS    | GeneCard           |
| RET     | GeneCard           |
| MMP2    | GeneCard           |
| KRT4    | GeneCard           |
| INS     | GeneCard           |
| LAMC2   | GeneCard           |
| DST     | GeneCard           |
| COL7A1  | GeneCard           |
| VCAM1   | GeneCard           |
| BAX     | GeneCard           |
| CPLANE1 | GeneCard           |
| PIK3CA  | GeneCard           |
| KRT14   | GeneCard           |
| KRT1    | GeneCard           |
| HSPA4   | GeneCard           |
| GZMB    | GeneCard           |
| HLA-B   | GeneCard           |
| CDH1    | GeneCard           |
| HLA-DRA | GeneCard           |
| FLG     | GeneCard           |

|         |          |
|---------|----------|
| TGFBR2  | GeneCard |
| HSPD1   | GeneCard |
| TIMP2   | GeneCard |
| ITGB4   | GeneCard |
| KRT10   | GeneCard |
| PCNA    | GeneCard |
| HSPA8   | GeneCard |
| TERT    | GeneCard |
| CD1A    | GeneCard |
| ALB     | GeneCard |
| GPNMB   | GeneCard |
| RB1     | GeneCard |
| IVL     | GeneCard |
| TGFBR1  | GeneCard |
| FAS     | GeneCard |
| FBN1    | GeneCard |
| HLA-DQF | GeneCard |
| CD58    | GeneCard |
| DSG1    | GeneCard |
| IFNA1   | GeneCard |
| ITGAL   | GeneCard |
| HLA-DRE | GeneCard |
| KRT5    | GeneCard |
| CAT     | GeneCard |
| MX1     | GeneCard |
| IRF6    | GeneCard |
| NTRK1   | GeneCard |
| HLA-A   | GeneCard |
| HMGCR   | GeneCard |
| MMP3    | GeneCard |
| BRCA1   | GeneCard |
| ABCB1   | GeneCard |
| CCL2    | GeneCard |
| CYP2C9  | GeneCard |
| PTEN    | GeneCard |
| ELN     | GeneCard |
| TGM1    | GeneCard |
| FGFR1   | GeneCard |
| CDKN1B  | GeneCard |
| TGFA    | GeneCard |
| CYP2C19 | GeneCard |
| CD8A    | GeneCard |
| CD4     | GeneCard |
| CD36    | GeneCard |
| SHBG    | GeneCard |
| DEFB1   | GeneCard |
| DSC1    | GeneCard |
| MKI67   | GeneCard |
| MTHFR   | GeneCard |
| F13A1   | GeneCard |
| MPO     | GeneCard |

|          |          |
|----------|----------|
| PDPN     | GeneCard |
| SERPINC1 | GeneCard |
| LAMB3    | GeneCard |
| IL12A    | GeneCard |
| DKC1     | GeneCard |
| IFNB1    | GeneCard |
| CD40LG   | GeneCard |
| CCR1     | GeneCard |
| PPARG    | GeneCard |
| IL5      | GeneCard |
| CDK4     | GeneCard |
| IL1RN    | GeneCard |
| CCR6     | GeneCard |
| DEFB103  | GeneCard |
| ECM1     | GeneCard |
| SELE     | GeneCard |
| ESR1     | GeneCard |
| SOD1     | GeneCard |
| CTNNB1   | GeneCard |
| AIRE     | GeneCard |
| ABCG2    | GeneCard |
| FASLG    | GeneCard |
| MYC      | GeneCard |
| H2AC18   | GeneCard |
| TGIF1    | GeneCard |
| EGF      | GeneCard |
| GSTP1    | GeneCard |
| SUMO1    | GeneCard |
| ERBB2    | GeneCard |
| FGFR3    | GeneCard |
| CYP1A2   | GeneCard |
| SLC6A4   | GeneCard |
| CASP8    | GeneCard |
| BMP4     | GeneCard |
| GPT      | GeneCard |
| MGMT     | GeneCard |
| GCG      | GeneCard |
| SLC17A5  | GeneCard |
| RELA     | GeneCard |
| CALCA    | GeneCard |
| CSF2     | GeneCard |
| INSR     | GeneCard |
| NFKB1    | GeneCard |
| RARB     | GeneCard |
| XYLT1    | GeneCard |
| BIRC5    | GeneCard |
| JUN      | GeneCard |
| GGT1     | GeneCard |
| ADH1C    | GeneCard |
| LEP      | GeneCard |
| CD79A    | GeneCard |

|          |          |
|----------|----------|
| ACVRL1   | GeneCard |
| JAK3     | GeneCard |
| CSF3     | GeneCard |
| CD40     | GeneCard |
| NGF      | GeneCard |
| CD274    | GeneCard |
| TLR9     | GeneCard |
| SELL     | GeneCard |
| KRAS     | GeneCard |
| TRPV1    | GeneCard |
| ABCC6    | GeneCard |
| AHR      | GeneCard |
| RIPK1    | GeneCard |
| IGFBP3   | GeneCard |
| F3       | GeneCard |
| CD34     | GeneCard |
| GH1      | GeneCard |
| TAC1     | GeneCard |
| DPP4     | GeneCard |
| CYP21A2  | GeneCard |
| SOX2     | GeneCard |
| AR       | GeneCard |
| MIR29A   | GeneCard |
| SERPINB1 | GeneCard |
| DSP      | GeneCard |
| FOS      | GeneCard |
| XYLT2    | GeneCard |
| ACTC1    | GeneCard |
| CPT2     | GeneCard |
| IL31     | GeneCard |
| PRF1     | GeneCard |
| LTA      | GeneCard |
| TTR      | GeneCard |
| CD27     | GeneCard |
| MYLK     | GeneCard |
| MIR29B1  | GeneCard |
| RYR1     | GeneCard |
| MMP14    | GeneCard |
| HLA-C    | GeneCard |
| POMC     | GeneCard |
| IFNA2    | GeneCard |
| BCL2L1   | GeneCard |
| CA9      | GeneCard |
| SELP     | GeneCard |
| FGF2     | GeneCard |
| TNFRSF1  | GeneCard |
| ITGA2    | GeneCard |
| DEFA1    | GeneCard |
| MIR27A   | GeneCard |
| ADIPOQ   | GeneCard |
| KRT2     | GeneCard |

|         |          |
|---------|----------|
| PDCD1   | GeneCard |
| PECAM1  | GeneCard |
| CD69    | GeneCard |
| IL2RB   | GeneCard |
| MYD88   | GeneCard |
| DNMT3B  | GeneCard |
| MIR122  | GeneCard |
| LORICRI | GeneCard |
| CD1E    | GeneCard |
| CCK     | GeneCard |
| TTN     | GeneCard |
| MIR19A  | GeneCard |
| TACR1   | GeneCard |
| FZD6    | GeneCard |
| GNLY    | GeneCard |
| MIR26B  | GeneCard |
| TP73    | GeneCard |
| ERCC1   | GeneCard |
| PDGFRB  | GeneCard |
| CCR4    | GeneCard |
| CAV1    | GeneCard |
| ALDH1A1 | GeneCard |
| ITGB2   | GeneCard |
| SYP     | GeneCard |
| IRS1    | GeneCard |
| FCGR3B  | GeneCard |
| CCR7    | GeneCard |
| MEN1    | GeneCard |
| ITGA3   | GeneCard |
| NGFR    | GeneCard |
| SMAD7   | GeneCard |
| MIF     | GeneCard |
| CD38    | GeneCard |
| IGFBP1  | GeneCard |
| FIP1L1  | GeneCard |
| KRT15   | GeneCard |
| DMD     | GeneCard |
| C3      | GeneCard |
| CXCL1   | GeneCard |
