# Supplementary material for: Network Pharmacology and Molecular Docking Analysis Explores the Mechanisms of Cordyceps sinensis in the Treatment of Oral Lichen Planus
Source: Hindawi journal article supplement (doi:10.1155/2022/3156785), 2022-08-29
Supplement: f1 [file 3156785.f1.zip]

Supplement 4. The 67 common targets of *Cordyceps sinensis* and OLP

**Gene symbol**

CYP2C9  
RARB  
IGF1  
BCL2L1  
MMP2  
DPP4  
ITGAL  
MDM2  
JAK3  
VDR  
KDR  
CASP3  
FGFR1  
GSTP1  
SHBG  
IL2  
PPARG  
ADH1C  
MMP3  
ALB  
TTR  
AR  
EGFR  
ESR1  
CD1A  
INSR  
TGFB1  
MIF  
HSPA8  
MMP9  
HRAS  
AKT1  
TGFB2  
MMP1  
RELA  
CDK4  
PTGS2  
SELP  
TNFRSF1B  
PTEN  
PECAM1  
EGF  
SOD1  
BCL2  
BAX  
JUN  
CASP8  
TGFB1  
TNF

CCL2  
IL6  
ABCG2  
INS  
TP53  
CDKN1A  
IL1B  
FOS  
AHR  
CD69  
IL2RA  
VEGFA  
HIF1A  
IL4  
IFNG  
CXCL8  
MPO  
CCND1
