# Supplementary material for: Network Pharmacology and Molecular Docking Analysis Explores the Mechanisms of Cordyceps sinensis in the Treatment of Oral Lichen Planus
Source: Hindawi journal article supplement (doi:10.1155/2022/3156785), 2022-08-29
Supplement: f1 [file 3156785.f1.zip]

Supplement 6. The top 20 of signaling pathways

| ID       | Description                                          | GeneRatio | pvalue      | Count |
|----------|------------------------------------------------------|-----------|-------------|-------|
| hsa04151 | PI3K-Akt signaling pathway                           | 24/65     | 9.02826E-17 | 24    |
| hsa05166 | Human T-cell leukemia virus 1 infection              | 21/65     | 1.01961E-17 | 21    |
| hsa04010 | MAPK signaling pathway                               | 21/65     | 4.28665E-15 | 21    |
| hsa04933 | AGE-RAGE signaling pathway in diabetic complications | 19/65     | 7.54756E-22 | 19    |
| hsa05161 | Hepatitis B                                          | 19/65     | 1.0634E-17  | 19    |
| hsa05163 | Human cytomegalovirus infection                      | 19/65     | 5.28779E-15 | 19    |
| hsa05215 | Prostate cancer                                      | 18/65     | 1.64685E-20 | 18    |
| hsa05162 | Measles                                              | 18/65     | 1.43828E-17 | 18    |
| hsa05205 | Proteoglycans in cancer                              | 18/65     | 1.58304E-14 | 18    |
| hsa05167 | Kaposi sarcoma-associated herpesvirus infection      | 17/65     | 9.13455E-14 | 17    |
| hsa05165 | Human papillomavirus infection                       | 17/65     | 5.37681E-10 | 17    |
| hsa04657 | IL-17 signaling pathway                              | 16/65     | 1.23077E-17 | 16    |
| hsa01522 | Endocrine resistance                                 | 16/65     | 2.48374E-17 | 16    |
| hsa05418 | Fluid shear stress and atherosclerosis               | 16/65     | 7.81827E-15 | 16    |
| hsa05169 | Epstein-Barr virus infection                         | 16/65     | 2.85742E-12 | 16    |
| hsa05210 | Colorectal cancer                                    | 15/65     | 9.74267E-17 | 15    |
| hsa05142 | Chagas disease                                       | 15/65     | 1.42011E-15 | 15    |
| hsa04659 | Th17 cell differentiation                            | 15/65     | 2.98096E-15 | 15    |
| hsa04068 | FoxO signaling pathway                               | 15/65     | 6.55291E-14 | 15    |
| hsa05224 | Breast cancer                                        | 15/65     | 3.68883E-13 | 15    |
