# Supplementary material for: Network Pharmacology and Molecular Docking Analysis Explores the Mechanisms of Cordyceps sinensis in the Treatment of Oral Lichen Planus
Source: Hindawi journal article supplement (doi:10.1155/2022/3156785), 2022-08-29
Supplement: f1 [file 3156785.f1.zip]

Supplement 5. The top 10 of Biological process, Cellular component and Molecular function

| <b>GOterm</b>                                           | <b>subgroup</b>    | <b>Gene number</b> |
|---------------------------------------------------------|--------------------|--------------------|
| extrinsic apoptotic signaling pathway                   | Biological process | 19                 |
| regulation of apoptotic signaling pathway               | Biological process | 22                 |
| gland development                                       | Biological process | 22                 |
| negative regulation of apoptotic signaling pathway      | Biological process | 18                 |
| regulation of reactive oxygen species metabolic process | Biological process | 17                 |
| muscle cell proliferation                               | Biological process | 18                 |
| T cell activation                                       | Biological process | 22                 |
| regulation of smooth muscle cell proliferation          | Biological process | 16                 |
| smooth muscle cell proliferation                        | Biological process | 16                 |
| response to lipopolysaccharide                          | Biological process | 19                 |
| membrane raft                                           | Cellular component | 13                 |
| membrane microdomain                                    | Cellular component | 13                 |
| membrane region                                         | Cellular component | 13                 |
| vesicle lumen                                           | Cellular component | 12                 |
| secretory granule lumen                                 | Cellular component | 11                 |
| cytoplasmic vesicle lumen                               | Cellular component | 11                 |
| platelet alpha granule                                  | Cellular component | 7                  |
| transcription factor complex                            | Cellular component | 10                 |
| RNA polymerase II transcription factor complex          | Cellular component | 7                  |
| platelet alpha granule lumen                            | Cellular component | 5                  |
| cytokine receptor binding                               | Molecular function | 15                 |
| receptor ligand activity                                | Molecular function | 15                 |
| cytokine activity                                       | Molecular function | 11                 |
| ubiquitin protein ligase binding                        | Molecular function | 11                 |
| ubiquitin-like protein ligase binding                   | Molecular function | 11                 |
| nuclear receptor activity                               | Molecular function | 6                  |
| transcription factor activity                           | Molecular function | 6                  |
| protease binding                                        | Molecular function | 8                  |
| transmembrane receptor protein kinase activity          | Molecular function | 6                  |
| growth factor receptor binding                          | Molecular function | 7                  |
