# Supplementary material for: Network Pharmacology and Molecular Docking Analysis Explores the Mechanisms of Cordyceps sinensis in the Treatment of Oral Lichen Planus
Source: Hindawi journal article supplement (doi:10.1155/2022/3156785), 2022-08-29
Supplement: f1 [file 3156785.f1.zip]

Supplement 1. The summary of putative targets of *Cordyceps sinensis*

LSS

CYP2C9

RARB

HNF4G

OAT

FABP7

CYP2C8

FOLH1

TRAPPC3

FABP3

GRB2

PROCR

HSD11B1

MET

ADK

F10

ADH5

SEC14L2

RORA

HSP90AB1

ABO

PYGL

ADAM17

BCL2L1

MMP2

RBP4

ERBB4

DPP4

CRABP2

RXRB

ITGAL

ITK

RARG

FABP4

MDM2

S100A9

BLVRB

PLA2G2A

TYMS

NR1H3

PDE5A

JAK3

NR3C2

ESRRA

VDR

PTPN11

SERPINA1

GM2A

SULT2B1

GC

NR3C1  
FABP5  
HDAC8  
PPARA  
ESRRG  
CDK2  
ANXA5  
MAPK14  
KIF11  
TPSB2  
GSTA1  
NR1I3  
PCTP  
FECH  
PDPK1  
THRA  
NR1H4  
WAS  
TTPA  
MAP2K1  
HMOX1  
HSD17B1  
BHMT  
HNMT  
SULT2A1  
SYK  
KDR  
FABP6  
PGR  
CASP3  
F2  
ABL1  
FGFR1  
PIK3R1  
RXRA  
FNTA  
GSTP1  
SHBG  
IL2  
AKR1C1  
PARP1  
REN  
PDE4D  
EPHB4  
HSP90AA1  
NR1H2  
PDE3B  
NR1I2  
RARA  
GSK3B  
MMP13

PPARG  
CA2  
ADH1C  
PDK2  
PPP1CC  
XIAP  
MAOA  
MMP8  
CTSK  
ELANE  
FKBP1A  
MMP3  
PPARD  
HMGCR  
ALB  
CHEK1  
DCK  
TTR  
CFD  
PDE4B  
PTPN1  
NQO1  
AKR1B1  
AR  
CCNA2  
PADI4  
LTA4H  
MMP12  
BACE1  
CHIT1  
PIM1  
LCK  
F11  
ACADM  
FGFR2  
CASP1  
MTHFD1  
EGFR  
JAK2  
ESR2  
MAOB  
PAH  
SOD2  
ESR1  
SORD  
PCK1  
MTAP  
GSTA3  
LCN2  
DHODH  
AKR1C3

THRB  
MME  
FKBP1B  
NOS3  
MAPK1  
MAPK8  
YARS  
ALAD  
PLA2G10  
CD1A  
KIT  
DPEP1  
AMD1  
MAPK10  
INSR  
SRC  
CTSB  
AURKA  
TGFB1  
BIRC7  
CTNNA1  
CES1  
FKBP3  
TEK  
F7  
AMY2A  
PIK3CG  
CTSF  
IGF1R  
PSAP  
CTSS  
CA1  
SHMT1  
TGFB2  
HCK  
PNMT  
DHFR  
MAPKAPK2  
DTYMK  
GSTM1  
KAT2B  
GART  
AKR1C2  
GCK  
BST1  
AMY1B  
EPHX2  
PGF  
BCAT2  
RAN  
PLK1

TGM3  
PRKCQ  
FDPS  
SULT1E1  
ZAP70  
AMY1A  
GLO1  
TRDMT1  
NQO2  
CMA1  
PPIA  
MIF  
HSPA8  
BTK  
EIF4E  
CBR1  
NT5M  
CTSG  
CDK6  
MMP9  
IGLV2-8  
AMY1B  
MAN1B1  
G6PD  
GALK1  
PLAU  
IMPA1  
HK1  
GNPDA1  
GP1BA  
NOS2  
PNP  
RAB5A  
RAB11A  
UAP1  
CLEC4M  
ANG  
GMPR2  
LGALS2  
IMPDH2  
HEXB  
AMY1C  
RAC1  
CD209  
HRAS  
GMPR  
ACPP  
UCK2  
HAGH  
SRM  
LGALS3

HINT1  
GPI  
ARG2  
AHCY  
RAP2A  
STAT1  
RAB9A  
APRT  
RNASE3  
GBA  
ITPKA  
AK1  
EPHA2  
DOT1L  
DCPS  
PKLR  
WARS  
AKT1  
APAF1  
CDK5R1  
TGFB2  
MMP7  
FGG  
ADAM33  
HPRT1  
TPH1  
CDA  
HADH  
DAPK1  
MMP1  
TNK2  
ATOX1  
CLK1  
SULT1A1  
ERI1  
MMP16  
TAP1  
RHOA  
GALE  
RELA  
ABCG1  
ABCC4  
HERC5  
CDK4  
KCNK10  
GLB1  
PTGS2  
PLA2G4A  
SELP  
TNFRSF1A  
TNFRSF1B

PTGES  
ALDH3A1  
PTGES2  
PTEN  
PPP5C  
RETN  
ALOX5  
PECAM1  
ABCA1  
KCNK2  
ALDH2  
UCP2  
CETP  
COL1A2  
C1R  
PRKCB  
EGF  
APOD  
CYP1B1  
F2R  
TRPC4  
SOD1  
TRPM8  
SMO  
MAPK3  
EGR1  
YWHAZ  
NFE2L2  
PLA2G1B  
XDH  
PTGS1  
SCNN1A  
ASIC3  
TRPV4  
IDO1  
SH3GL2  
VIM  
TWIST1  
MAP2  
BCL2  
CASP9  
BAX  
JUN  
PON1  
CASP8  
PRKCA  
TGFB1  
PRKAA2  
EDN1  
DHCR7  
TNF

CCL2  
IL6  
CXCL12  
ABCG2  
GAL  
HNF4A  
INS  
RASGRF2  
CDC42  
TP53  
CDKN1A  
RUNX1T1  
EIF6  
PCSK9  
BID  
ALDH18A1  
DDIT3  
TEP1  
SLC2A1  
APP  
IL1B  
AGT  
FOS  
PDGFA  
CCNB1  
WEE1  
CDK1  
CYCS  
NFKBIA  
CYP1A1  
AHR  
CD69  
IL2RA  
VEGFA  
HIF1A  
IL4  
IFNG  
MGAM  
SI  
CXCL8  
MPO  
TH  
ACHE  
PDK4  
GATA2  
ADORA3  
P2RY1  
NT5E
